# Supplementary material
Source: publisher site journal article supplement (https://www.dovepress.com/article/243531)
Supplement: Supplementary file 1 [file get_supplementary_file.php]

| **Sociodemographic characteristics** | **North Denmark Region** | **Capital Region of Copenhagen** | **Total** | **Missing** |
| --- | --- | --- | --- | --- |
| **n (%)** | 585,499 (24.7) | 1,789,174 (75.3) | 2,374,673 (100.0) | 0 (0.00) |
| **Type of contact, n (%)** |  |  |  |  |
| No contact | 420,984 (71.9) | 1,333,832 (74.6) | 1,754,816 (73.9) |  |
| EMS | 15,658 (2.7) | 50,850 (2.8) | 66,508 (2.8) |  |
| OOH-PC | 148,857 (25.4) | 404,492 (22.6) | 553,349 (23.3) | 0 (0.00) |
| **Sex, n (%)** |  |  |  |  |
| Male | 295,564 (50.5) | 877,759 (49.1) | 1,173,323 (49.4) |  |
| Female | 289,935 (49.5) | 911,415 (50.9) | 1,201,350 (50.6) | 0 (0.00) |
| **Age, mean (SD)** | 42.2 (23.6) | 39.8 (22.8) | 40.4 (23.0) | 0 (0.00) |
| **Age groups (years), n (%)** |  |  |  |  |
| 0-18 | 122,608 (20.9) | 379,636 (21.2) | 502,244 (21.2) |  |
| 19-30 | 90,314 (15.4) | 321,109 (17.9) | 411,423 (17.3) |  |
| 31-65 | 260,207 (44.4) | 807,339 (45.1) | 1,067,546 (45.0) |  |
| 66-80 | 87,768 (15.0) | 220,205 (12.3) | 307,973 (13.0) |  |
| 81+ | 24,602 (4.2) | 60,885 (3.4) | 85,487 (3.6) | 0 (0.00) |
| **Socioeconomic classification, n (%)** | |  |  |  |
| Unemployed | 6,263 (1.1) | 22,560 (1.3) | 28,823 (1.2) |  |
| Children and youth (not in education) | 94,249 (16.1) | 302,603 (16.9) | 396,852 (16.7) |  |
| Early retirement pay | 11,041 (1.9) | 18,177 (1.0) | 29,218 (1.2) |  |
| Old age pension | 108,242 (18.5) | 261,950 (14.6) | 370,192 (15.6) |  |
| Disability pension | 23,900 (4.1) | 47,651 (2.7) | 71,551 (3.0) |  |
| Cash benefits | 19,368 (3.3) | 53,268 (3.0) | 72,636 (3.1) |  |
| Employed | 225,640 (38.5) | 738,199 (41.3) | 963,839 (40.6) |  |
| Receiving sick pay, leave pay etc. | 5,431 (0.9) | 14,520 (0.8) | 19,951 (0.8) |  |
| Self-employed | 16,183 (2.8) | 52,748 (2.9) | 68,931 (2.9) |  |
| Enrolled in education (ordinary) | 60,127 (10.3) | 202,885 (11.3) | 263,012 (11.1) |  |
| Other | 15,014 (2.6) | 74,486 (4.2) | 89,500 (3.8) | 168 (0.01) |
| **Income (quartiles), n (%)** |  |  |  |  |
| 1st quartile (highest) | 93,993 (16.1) | 499,675 (27.9) | 593,668 (25.0) |  |
| 2nd quartile | 163,850 (28.0) | 429,818 (24.0) | 593,668 (25.0) |  |
| 3rd quartile | 179,943 (30.7) | 413,724 (23.1) | 593,667 (25.0) |  |
| 4th quartile (lowest) | 147,713 (25.2) | 445,957 (24.9) | 593,670 (25.0) | 0 (0.00) |
| **Ethnicity, n (%)** |  |  |  |  |
| Danish | 539,264 (92.1) | 1,462,202 (81.7) | 2,001,466 (84.3) |  |
| Western countries | 19,445 (3.3) | 110,762 (6.2) | 130,207 (5.5) |  |
| Non-western countries | 26,790 (4.6) | 216,210 (12.1) | 243,000 (10.2) | 0 (0.00) |
| **Family type, n (%)** |  |  |  |  |
| Living alone | 180,037 (30.7) | 678640 (37.9) | 858,677 (36.2) |  |
| Cohabitating | 405,462 (69.3) | 1110534 (62.1) | 1,515,996 (63.8) | 0 (0.00) |
| **Education level (years), n (%)** | |  |  |  |
| <10 | 174,104 (35.8) | 384,592 (26.6) | 558,696 (28.9) |  |
| 10-15 | 202,438 (41.7) | 534,431 (37.0) | 736,869 (38.1) |  |
| >15 | 109,472 (22.5) | 527,159 (36.5) | 636,631 (32.9) | 442,477 (18.63) |

**Table S1.** Sensitivity analysis for the association between sociodemographic variables and adjusted odds ratios for EMS vs. OOH-PC contact using the most frequently OOH service contacted, OR 95%CI, N=619,857. **Note:** Missing values in variables education level (151,162) and socioeconomic classification (26), thus analyses only included 468,695 and 619,831 individuals for the two variables.

| Variable | OR (95%CI) |
| --- | --- |
| Family type | |
| Living alone | 1.36 (1.34-1.39) |
| Cohabitating | ref |
| Income (quartiles) | |
| 1st (highest) | ref |
| 2nd | 1.05 (1.02-1.44) |
| 3rd | 1.27 (1.24-1.31) |
| 4th | 1.60 (1.55-1.64) |
| Ethnicity | |
| Non-western | 1.34 (1.30-1.38) |
| Western | 1.37 (1.31-1.44) |
| Danish | ref |
| Education level | |
| <10 years | ref |
| 10-15 years | 0.84 (0.82-0.86) |
| >15 years | 0.72 (0.70-0.73) |
| Socioeconomic classification |  |
| Other | 1.84 (1.74-1.95) |
| Enrolled in education (ordinary) | 1.33 (1.28-1.39) |
| Self-employed | 0.99 (0.92-1.05) |
| Receiving sick pay, leave pay etc. | 1.44 (1.31-1.58) |
| Cash benefit | 2.32 (2.23-2.42) |
| Disability pension | 2.13 (2.04-2.21) |
| Old age pension | 1.69 (1.63-1.76) |
| Early retirement pay | 1.64 (1.51-1.78) |
| Children and youth (not in education) | 0.71 (0.68-0.75) |
| Unemployed | 1.52 (1.40-1.65) |
| Employed | ref |
| Age groups | |
| 81+ | 3.21 (3.13-3.30) |
| 66-80 | 2.78 (2.72-2.84) |
| 31-65 | ref |
| 19-30 | 0.59 (0.57-0.60) |
| >0-18 | 0.30 (0.29-0.31) |
| Sex | |
| Female | 0.69 (0.68-0.70) |
| Male | ref |

**Table S2.** Population characteristics separated by region, N= 2,374,673

**Table S3.** Ratio of contact rates for each sociodemographic variable, adjusted IRR 95%CI, N=2,374,673. **Note:** Missing values in variables education level (151,162) and socioeconomic classification (168), thus analyses only included 1,932,196 and 2,374,505 individuals for the two variables.

| Variable | IRR (95%CI) |
| --- | --- |
| Family type | |
| Living alone | 1.08 (1.08-1.09) |
| Cohabitating | ref |
| Income (quartiles) | |
| 1st (highest) | ref |
| 2nd | 1.19 (1.19-1.20) |
| 3rd | 1.41 (1.40-1.42) |
| 4th | 1.31 (1.30-1.32) |
| Ethnicity | |
| Non-western | 1.02 (1.01-1.02) |
| Western | 0.65 (0.64-0.66) |
| Danish | ref |
| Education level | |
| <10 years | ref |
| 10-15 years | 0.84 (0.83-0.84) |
| >15 years | 0.67 (0.67-0.68) |
| Socioeconomic classification |  |
| Other | 0.76 (0.75-0.77) |
| Enrolled in education (ordinary) | 0.97 (0.97-0.98) |
| Self-employed | 1.02 (1.00-1.03) |
| Receiving sick pay, leave pay etc. | 1.34 (1.31-1.37) |
| Cash benefit | 1.58 (1.57-1.60) |
| Disability pension | 1.79 (1.77-1.81) |
| Old age pension | 1.89 (1.87-1.91) |
| Early retirement pay | 0.98 (0.95-1.00) |
| Children and youth (not in education) | 1.12 (1.11-1.13) |
| Unemployed | 1.15 (1.12-1.17) |
| Employed | ref |
| Age groups | |
| 81+ | 2.00 (1.98-2.02) |
| 66-80 | 1.05 (1.04-1.06) |
| 31-65 | ref |
| 19-30 | 1.31 (1.30-1.32) |
| >0-18 | 1.66 (1.66-1.67) |
| Sex | |
| Female | 1.16 (1.16-1.17) |
| Male | ref |

**Table S4.** The association between sociodemographic variables and adjusted odds ratios for EMS vs. OOH-PC contact, OR 95%CI, N=619,857. **Note:** Missing values in variables education level (151,162) and socioeconomic classification (26), thus analyses only included 468,695 and 619,831 individuals for the two variables.

| Variable | OR (95%CI) |
| --- | --- |
| Family type | |
| Living alone | 1.40 (1.37-1.42) |
| Cohabitating | ref |
| Income (quartiles) | |
| 1st (highest) | ref |
| 2nd | 1.10 (1.07-1.14) |
| 3rd | 1.38 (1.35-1.42) |
| 4th | 1.76 (1.72-1.81) |
| Ethnicity | |
| Non-western | 1.36 (1.32-1.39) |
| Western | 1.33 (1.27-1.38) |
| Danish | ref |
| Education level | |
| <10 years | ref |
| 10-15 years | 0.80 (0.78-0.81) |
| >15 years | 0.65 (0.64-0.67) |
| Socioeconomic classification |  |
| Other | 1.90 (1.81-2.00) |
| Enrolled in education (ordinary) | 1.38 (1.33-1.44) |
| Self-employed | 1.01 (0.95-1.07) |
| Receiving sick pay, leave pay etc. | 1.51 (1.39-1.65) |
| Cash benefit | 2.45 (2.36-2.54) |
| Disability pension | 2.28 (2.20-2.37) |
| Old age pension | 1.89 (1.83-1.96) |
| Early retirement pay | 1.66 (1.54-1.79) |
| Children and youth (not in education) | 0.76 (0.73-0.80) |
| Unemployed | 1.51 (1.40-1.62) |
| Employed | ref |
| Age groups | |
| 81+ | 3.21 (3.13-3.30) |
| 66-80 | 2.78 (2.72-2.84) |
| 31-65 | ref |
| 19-30 | 0.59 (0.57-0.60) |
| >0-18 | 0.30 (0.29-0.31) |
| Sex | |
| Female | 0.69 (0.68-0.70) |
| Male | ref |
